# Supplementary material
Source: bioRxiv or medRxiv preprint supplement (https://www.medrxiv.org/highwire/filestream/73723/field_highwire_adjunct_files/1/2020.03.12.20034991-2.pdf)
Supplement: Supplementary file [file 2020.03.12.20034991-2.pdf]

**Supplementary Table 1.** Three tiers of candidate genes used to prioritize germline variants from whole genome sequencing. Tier 1 genes underlie Lynch syndrome. Tier 2 genes assessed by the ClinGen Hereditary Colorectal Cancer and Polyposis Susceptibility Gene Curation Panel to have definitive, strong or moderate evidence supporting an association with hereditary CRC and/or polyposis or other syndromes with rare manifestation of CRC and/or polyposis. Tier 3 genes contain a curated list of DNA repair genes as described in the literature.

| <b>Chromosome</b> | <b>Start</b> | <b>End</b> | <b>Gene symbol</b> | <b>Gene Tier</b> |
|-------------------|--------------|------------|--------------------|------------------|
| chr2              | 47596286     | 47614167   | <i>EPCAM</i>       | 1                |
| chr2              | 47630205     | 47710367   | <i>MSH2</i>        | 1                |
| chr2              | 48010220     | 48034092   | <i>MSH6</i>        | 1                |
| chr3              | 37034840     | 37092337   | <i>MLH1</i>        | 1                |
| chr7              | 6010555      | 6048737    | <i>PMS2</i>        | 1                |
| chr5              | 112043201    | 112181936  | <i>APC</i>         | 2                |
| chr11             | 108093558    | 108239826  | <i>ATM</i>         | 2                |
| chr17             | 63524680     | 63557740   | <i>AXIN2</i>       | 2                |
| chr15             | 91260557     | 91358692   | <i>BLM</i>         | 2                |
| chr10             | 88516395     | 88684945   | <i>BMPRIA</i>      | 2                |
| chr16             | 68771192     | 68869445   | <i>CDH1</i>        | 2                |
| chr17             | 17115525     | 17140502   | <i>FLCN</i>        | 2                |
| chr15             | 33010204     | 33026870   | <i>GREM1</i>       | 2                |
| chr14             | 75480466     | 75518235   | <i>MLH3</i>        | 2                |
| chr5              | 79950466     | 80172634   | <i>MSH3</i>        | 2                |
| chr1              | 45794913     | 45806142   | <i>MUTYH</i>       | 2                |
| chr16             | 2089815      | 2097870    | <i>NTHL1</i>       | 2                |
| chr19             | 50887579     | 50921275   | <i>POLD1</i>       | 2                |
| chr12             | 133200347    | 133264110  | <i>POLE</i>        | 2                |
| chr10             | 89623194     | 89731687   | <i>PTEN</i>        | 2                |
| chr18             | 48556582     | 48611412   | <i>SMAD4</i>       | 2                |
| chr19             | 1205797      | 1228434    | <i>STK11</i>       | 2                |
| chr17             | 7571719      | 7590868    | <i>TP53</i>        | 2                |
| chr15             | 89164526     | 89175512   | <i>AEN</i>         | 3                |
| chr14             | 78138748     | 78174356   | <i>ALKBH1</i>      | 3                |
| chr12             | 109525992    | 109531293  | <i>ALKBH2</i>      | 3                |
| chr11             | 43902356     | 43941825   | <i>ALKBH3</i>      | 3                |
| chr14             | 20923289     | 20925931   | <i>APEX1</i>       | 3                |
| chrX              | 55026755     | 55034306   | <i>APEX2</i>       | 3                |
| chr2              | 68694690     | 68807294   | <i>APLF</i>        | 3                |
| chr9              | 32972603     | 33001639   | <i>APTX</i>        | 3                |
| chr6              | 100956069    | 101329248  | <i>ASCC3</i>       | 3                |
| chr3              | 142168076    | 142297668  | <i>ATR</i>         | 3                |

|       |           |           |                |   |
|-------|-----------|-----------|----------------|---|
| chr3  | 48488113  | 48507054  | <i>ATRIP</i>   | 3 |
| chrX  | 76760355  | 77041755  | <i>ATRX</i>    | 3 |
| chr19 | 17378184  | 17390162  | <i>BABAMI</i>  | 3 |
| chr2  | 215590369 | 215674435 | <i>BARD1</i>   | 3 |
| chr1  | 115110177 | 115124265 | <i>BCAS2</i>   | 3 |
| chr17 | 41196311  | 41277500  | <i>BRCA1</i>   | 3 |
| chr13 | 32889616  | 32973809  | <i>BRCA2</i>   | 3 |
| chrX  | 154299694 | 154351349 | <i>BRCC3</i>   | 3 |
| chr2  | 28111575  | 28561768  | <i>BRE</i>     | 3 |
| chr17 | 59756546  | 59940920  | <i>BRIP1</i>   | 3 |
| chr5  | 86690078  | 86708850  | <i>CCNH</i>    | 3 |
| chr3  | 48198667  | 48229801  | <i>CDC25A</i>  | 3 |
| chr20 | 3767418   | 3786768   | <i>CDC25B</i>  | 3 |
| chr5  | 137620953 | 137674044 | <i>CDC25C</i>  | 3 |
| chr6  | 44355250  | 44418161  | <i>CDC5L</i>   | 3 |
| chr5  | 68530621  | 68573257  | <i>CDK7</i>    | 3 |
| chr1  | 10490158  | 10502872  | <i>CENPS</i>   | 3 |
| chr17 | 79976578  | 79980794  | <i>CENPX</i>   | 3 |
| chrX  | 151995870 | 151999301 | <i>CETN2</i>   | 3 |
| chr19 | 4402659   | 4443394   | <i>CHAF1A</i>  | 3 |
| chr11 | 125495030 | 125546151 | <i>CHEK1</i>   | 3 |
| chr22 | 29083730  | 29137822  | <i>CHEK2</i>   | 3 |
| chr1  | 155232658 | 155243320 | <i>CLK2</i>    | 3 |
| chr2  | 225334866 | 225450114 | <i>CUL3</i>    | 3 |
| chr13 | 113862506 | 113919392 | <i>CUL4A</i>   | 3 |
| chr11 | 107879407 | 107978488 | <i>CUL5</i>    | 3 |
| chr10 | 115594482 | 115614163 | <i>DCLRE1A</i> | 3 |
| chr1  | 114447240 | 114456708 | <i>DCLRE1B</i> | 3 |
| chr10 | 14946609  | 14996431  | <i>DCLRE1C</i> | 3 |
| chr11 | 61066918  | 61100684  | <i>DDB1</i>    | 3 |
| chr11 | 47236492  | 47260769  | <i>DDB2</i>    | 3 |
| chr22 | 38914953  | 38966201  | <i>DMC1</i>    | 3 |
| chr10 | 70173820  | 70231878  | <i>DNA2</i>    | 3 |
| chr10 | 98064084  | 98098321  | <i>DNTT</i>    | 3 |
| chr15 | 48623291  | 48635570  | <i>DUT</i>     | 3 |
| chr12 | 104697509 | 104698983 | <i>EID3</i>    | 3 |
| chr1  | 24069855  | 24088549  | <i>ELOA</i>    | 3 |
| chr16 | 2821414   | 2827297   | <i>ELOB</i>    | 3 |
| chr8  | 74857372  | 74884522  | <i>ELOC</i>    | 3 |
| chr17 | 48450580  | 48458820  | <i>EME1</i>    | 3 |

|       |           |           |                |   |
|-------|-----------|-----------|----------------|---|
| chr16 | 1823228   | 1826239   | <i>EME2</i>    | 3 |
| chr17 | 78388966  | 78411886  | <i>ENDOV</i>   | 3 |
| chr19 | 45910590  | 45927177  | <i>ERCC1</i>   | 3 |
| chr19 | 45854648  | 45873845  | <i>ERCC2</i>   | 3 |
| chr2  | 128014865 | 128051752 | <i>ERCC3</i>   | 3 |
| chr16 | 14014013  | 14046205  | <i>ERCC4</i>   | 3 |
| chr13 | 103498190 | 103528351 | <i>ERCC5</i>   | 3 |
| chr10 | 50662525  | 50747584  | <i>ERCC6</i>   | 3 |
| chr5  | 60169658  | 60240905  | <i>ERCC8</i>   | 3 |
| chr1  | 242011492 | 242053241 | <i>EXO1</i>    | 3 |
| chr1  | 40974390  | 40981722  | <i>EXO5</i>    | 3 |
| chr17 | 79506910  | 79519429  | <i>FAAP100</i> | 3 |
| chr1  | 2115898   | 2144159   | <i>FAAP20</i>  | 3 |
| chr19 | 33463122  | 33468401  | <i>FAAP24</i>  | 3 |
| chr4  | 84382091  | 84406331  | <i>FAM175A</i> | 3 |
| chr15 | 31196054  | 31235311  | <i>FANI</i>    | 3 |
| chr16 | 89803958  | 89883065  | <i>FANCA</i>   | 3 |
| chrX  | 14861528  | 14891191  | <i>FANCB</i>   | 3 |
| chr9  | 97861335  | 98079991  | <i>FANCC</i>   | 3 |
| chr3  | 10068070  | 10143621  | <i>FANCD2</i>  | 3 |
| chr6  | 35420137  | 35434881  | <i>FANCE</i>   | 3 |
| chr11 | 22644078  | 22647387  | <i>FANCF</i>   | 3 |
| chr9  | 35073834  | 35080013  | <i>FANCG</i>   | 3 |
| chr15 | 89787193  | 89860362  | <i>FANCI</i>   | 3 |
| chr2  | 58386377  | 58468515  | <i>FANCL</i>   | 3 |
| chr14 | 45605141  | 45670093  | <i>FANCM</i>   | 3 |
| chr11 | 61560108  | 61564716  | <i>FEN1</i>    | 3 |
| chr1  | 68150859  | 68154021  | <i>GADD45A</i> | 3 |
| chr9  | 92219926  | 92221470  | <i>GADD45G</i> | 3 |
| chr2  | 17935124  | 17967187  | <i>GEN1</i>    | 3 |
| chr11 | 18343815  | 18388590  | <i>GTF2H1</i>  | 3 |
| chr5  | 70330950  | 70363497  | <i>GTF2H2</i>  | 3 |
| chr12 | 124118285 | 124147151 | <i>GTF2H3</i>  | 3 |
| chr6  | 30875976  | 30881880  | <i>GTF2H4</i>  | 3 |
| chr6  | 158589378 | 158620376 | <i>GTF2H5</i>  | 3 |
| chr11 | 118964583 | 118966177 | <i>H2AFX</i>   | 3 |
| chr4  | 84328495  | 84377036  | <i>HELQ</i>    | 3 |
| chr15 | 28356182  | 28567298  | <i>HERC2</i>   | 3 |
| chr3  | 193853930 | 193856401 | <i>HES1</i>    | 3 |
| chr1  | 91726322  | 91870426  | <i>HFM1</i>    | 3 |

|       |           |           |                 |   |
|-------|-----------|-----------|-----------------|---|
| chr3  | 148747850 | 148804341 | <i>HLTF</i>     | 3 |
| chr13 | 31032052  | 31191734  | <i>HMGB1</i>    | 3 |
| chr4  | 174252526 | 174255595 | <i>HMGB2</i>    | 3 |
| chr7  | 48002884  | 48019222  | <i>HUS1</i>     | 3 |
| chr2  | 209100950 | 209119867 | <i>IDH1</i>     | 3 |
| chr15 | 41271077  | 41408444  | <i>INO80</i>    | 3 |
| chr11 | 65479472  | 65487077  | <i>KAT5</i>     | 3 |
| chr19 | 48618701  | 48673860  | <i>LIG1</i>     | 3 |
| chr17 | 33307516  | 33332088  | <i>LIG3</i>     | 3 |
| chr13 | 108859789 | 108870716 | <i>LIG4</i>     | 3 |
| chr1  | 11734536  | 11751678  | <i>MAD2L2</i>   | 3 |
| chr3  | 129149786 | 129159022 | <i>MBD4</i>     | 3 |
| chr6  | 30667583  | 30685458  | <i>MDC1</i>     | 3 |
| chr10 | 131265447 | 131565884 | <i>MGMT</i>     | 3 |
| chr10 | 99218080  | 99258551  | <i>MMS19</i>    | 3 |
| chr14 | 61201458  | 61435398  | <i>MNAT1</i>    | 3 |
| chr15 | 79165122  | 79190081  | <i>MORF4L1</i>  | 3 |
| chr16 | 127017    | 135850    | <i>MPG</i>      | 3 |
| chr7  | 40172341  | 40174251  | <i>MPLKIP</i>   | 3 |
| chr11 | 94150465  | 94227074  | <i>MRE11</i>    | 3 |
| chr22 | 19419424  | 19423601  | <i>MRPL40</i>   | 3 |
| chr1  | 76262555  | 76378923  | <i>MSH4</i>     | 3 |
| chr6  | 31707724  | 31730455  | <i>MSH5</i>     | 3 |
| chr11 | 65627871  | 65633914  | <i>MUS81</i>    | 3 |
| chr12 | 56618124  | 56623638  | <i>NABP2</i>    | 3 |
| chr8  | 90945563  | 90996952  | <i>NBN</i>      | 3 |
| chr15 | 75639330  | 75647592  | <i>NEIL1</i>    | 3 |
| chr8  | 11627171  | 11644854  | <i>NEIL2</i>    | 3 |
| chr4  | 178230990 | 178284092 | <i>NEIL3</i>    | 3 |
| chr16 | 28962317  | 28977786  | <i>NFATC2IP</i> | 3 |
| chr2  | 219940045 | 220025587 | <i>NHEJ1</i>    | 3 |
| chr16 | 27236314  | 27280113  | <i>NSMCE1</i>   | 3 |
| chr8  | 126104082 | 126379367 | <i>NSMCE2</i>   | 3 |
| chr15 | 29560352  | 29562020  | <i>NSMCE3</i>   | 3 |
| chr10 | 123716602 | 123734743 | <i>NSMCE4A</i>  | 3 |
| chr7  | 2281856   | 2290780   | <i>NUDT1</i>    | 3 |
| chr13 | 48611702  | 48626878  | <i>NUDT15</i>   | 3 |
| chr8  | 21964382  | 21966932  | <i>NUDT18</i>   | 3 |
| chr3  | 9791627   | 9808353   | <i>OGG1</i>     | 3 |
| chr16 | 23614482  | 23652678  | <i>PALB2</i>    | 3 |

|       |           |           |               |   |
|-------|-----------|-----------|---------------|---|
| chr10 | 51026320  | 51371371  | <i>PARG</i>   | 3 |
| chr1  | 226548391 | 226595801 | <i>PARP1</i>  | 3 |
| chr14 | 20811772  | 20826063  | <i>PARP2</i>  | 3 |
| chr3  | 51976320  | 51982883  | <i>PARP3</i>  | 3 |
| chr13 | 24995068  | 25086948  | <i>PARP4</i>  | 3 |
| chr12 | 102513948 | 102591298 | <i>PARPBP</i> | 3 |
| chr7  | 154735399 | 154794682 | <i>PAXIP1</i> | 3 |
| chr20 | 5095598   | 5107268   | <i>PCNA</i>   | 3 |
| chr17 | 8043787   | 8055753   | <i>PER1</i>   | 3 |
| chr1  | 45265896  | 45271667  | <i>PLK3</i>   | 3 |
| chr4  | 155456148 | 155471585 | <i>PLRG1</i>  | 3 |
| chr2  | 190648810 | 190742355 | <i>PMS1</i>   | 3 |
| chr7  | 75137068  | 75157453  | <i>PMS2P3</i> | 3 |
| chr19 | 50364459  | 50370822  | <i>PNKP</i>   | 3 |
| chrX  | 24711949  | 25015103  | <i>POLA1</i>  | 3 |
| chr8  | 42195972  | 42229331  | <i>POLB</i>   | 3 |
| chr7  | 44154278  | 44163169  | <i>POLD2</i>  | 3 |
| chr11 | 74303574  | 74354105  | <i>POLD3</i>  | 3 |
| chr11 | 67118235  | 67121067  | <i>POLD4</i>  | 3 |
| chr14 | 50110269  | 50155098  | <i>POLE2</i>  | 3 |
| chr9  | 116169514 | 116173029 | <i>POLE3</i>  | 3 |
| chr2  | 75185774  | 75196859  | <i>POLE4</i>  | 3 |
| chr15 | 89859535  | 89878026  | <i>POLG</i>   | 3 |
| chr6  | 43543877  | 43588260  | <i>POLH</i>   | 3 |
| chr18 | 51795848  | 51824604  | <i>POLI</i>   | 3 |
| chr5  | 74807574  | 74901645  | <i>POLK</i>   | 3 |
| chr10 | 103338638 | 103348027 | <i>POLL</i>   | 3 |
| chr7  | 44111660  | 44122139  | <i>POLM</i>   | 3 |
| chr4  | 2073684   | 2243891   | <i>POLN</i>   | 3 |
| chr3  | 121150272 | 121264853 | <i>POLQ</i>   | 3 |
| chr16 | 30087296  | 30096698  | <i>PPP4C</i>  | 3 |
| chr18 | 9546788   | 9614605   | <i>PPP4R1</i> | 3 |
| chr3  | 73045893  | 73118352  | <i>PPP4R2</i> | 3 |
| chr14 | 94640648  | 94746072  | <i>PPP4R4</i> | 3 |
| chr8  | 48685668  | 48872743  | <i>PRKDC</i>  | 3 |
| chr11 | 60658018  | 60674061  | <i>PRPF19</i> | 3 |
| chr5  | 34905364  | 34915780  | <i>RADI</i>   | 3 |
| chr5  | 68665123  | 68710628  | <i>RADI7</i>  | 3 |
| chr3  | 8918879   | 9005159   | <i>RADI8</i>  | 3 |
| chr19 | 13056627  | 13064457  | <i>RAD23A</i> | 3 |

|       |           |           |               |   |
|-------|-----------|-----------|---------------|---|
| chr9  | 110045516 | 110094475 | <i>RAD23B</i> | 3 |
| chr5  | 131892615 | 131980313 | <i>RAD50</i>  | 3 |
| chr15 | 40987326  | 41024356  | <i>RAD51</i>  | 3 |
| chr14 | 68286495  | 69149835  | <i>RAD51B</i> | 3 |
| chr17 | 56769933  | 56811703  | <i>RAD51C</i> | 3 |
| chr17 | 33426810  | 33446888  | <i>RAD51D</i> | 3 |
| chr12 | 1020901   | 1099207   | <i>RAD52</i>  | 3 |
| chr8  | 95384187  | 95487343  | <i>RAD54B</i> | 3 |
| chr1  | 46713366  | 46744145  | <i>RAD54L</i> | 3 |
| chr11 | 67159422  | 67165883  | <i>RAD9A</i>  | 3 |
| chr12 | 110940004 | 110969891 | <i>RAD9B</i>  | 3 |
| chr18 | 20513294  | 20606449  | <i>RBBP8</i>  | 3 |
| chr22 | 41347350  | 41369019  | <i>RBX1</i>   | 3 |
| chr17 | 34245083  | 34257780  | <i>RDM1</i>   | 3 |
| chr12 | 21621843  | 21654603  | <i>RECQL</i>  | 3 |
| chr8  | 145736666 | 145743210 | <i>RECQL4</i> | 3 |
| chr17 | 73622924  | 73663269  | <i>RECQL5</i> | 3 |
| chr2  | 100016937 | 100106518 | <i>REVI</i>   | 3 |
| chr6  | 111620233 | 111804918 | <i>REV3L</i>  | 3 |
| chr4  | 39289068  | 39368001  | <i>RFC1</i>   | 3 |
| chr7  | 73645831  | 73668788  | <i>RFC2</i>   | 3 |
| chr13 | 34392205  | 34540695  | <i>RFC3</i>   | 3 |
| chr3  | 186507680 | 186524484 | <i>RFC4</i>   | 3 |
| chr12 | 118454465 | 118470044 | <i>RFC5</i>   | 3 |
| chr2  | 152266396 | 152333860 | <i>RIF1</i>   | 3 |
| chr9  | 86595636  | 86618989  | <i>RMII</i>   | 3 |
| chr16 | 11439294  | 11445620  | <i>RMI2</i>   | 3 |
| chr3  | 196195653 | 196230639 | <i>RNF168</i> | 3 |
| chr11 | 74459912  | 74553458  | <i>RNF169</i> | 3 |
| chr4  | 2470794   | 2517586   | <i>RNF4</i>   | 3 |
| chr6  | 37321747  | 37362514  | <i>RNF8</i>   | 3 |
| chr18 | 13726658  | 13764555  | <i>RNMT</i>   | 3 |
| chr17 | 1733272   | 1802848   | <i>RPA1</i>   | 3 |
| chr1  | 28218034  | 28241308  | <i>RPA2</i>   | 3 |
| chr7  | 7676193   | 7758238   | <i>RPA3</i>   | 3 |
| chrX  | 96138906  | 96140466  | <i>RPA4</i>   | 3 |
| chr11 | 4115914   | 4160155   | <i>RRM1</i>   | 3 |
| chr2  | 10262694  | 10271546  | <i>RRM2</i>   | 3 |
| chr8  | 103216728 | 103251346 | <i>RRM2B</i>  | 3 |
| chr20 | 62289162  | 62327606  | <i>RTEL1</i>  | 3 |

|       |           |           |                 |   |
|-------|-----------|-----------|-----------------|---|
| chr7  | 96318078  | 96339203  | <i>SEMI</i>     | 3 |
| chr3  | 4344987   | 4358949   | <i>SETMAR</i>   | 3 |
| chr6  | 146205942 | 146285233 | <i>SHPRH</i>    | 3 |
| chr16 | 30205163  | 30208887  | <i>SLX1A</i>    | 3 |
| chr16 | 29465821  | 29469545  | <i>SLX1B</i>    | 3 |
| chr16 | 3631181   | 3661607   | <i>SLX4</i>     | 3 |
| chr19 | 11071597  | 11172958  | <i>SMARCA4</i>  | 3 |
| chr4  | 95128758  | 95212443  | <i>SMARCAD1</i> | 3 |
| chr3  | 47627377  | 47823405  | <i>SMARCC1</i>  | 3 |
| chr9  | 72873877  | 72969789  | <i>SMC5</i>     | 3 |
| chr2  | 17845078  | 17935096  | <i>SMC6</i>     | 3 |
| chr12 | 54574141  | 54582778  | <i>SMUG1</i>    | 3 |
| chr6  | 21593971  | 21598850  | <i>SOX4</i>     | 3 |
| chr20 | 55904830  | 55919049  | <i>SPO11</i>    | 3 |
| chr1  | 231473681 | 231490775 | <i>SPRTN</i>    | 3 |
| chr9  | 131037657 | 131051268 | <i>SWI5</i>     | 3 |
| chr19 | 11485382  | 11487627  | <i>SWSAP1</i>   | 3 |
| chr8  | 54879113  | 54935016  | <i>TCEA1</i>    | 3 |
| chr12 | 104359592 | 104382656 | <i>TDG</i>      | 3 |
| chr14 | 90422245  | 90511108  | <i>TDPI</i>     | 3 |
| chr6  | 24650204  | 24667115  | <i>TDP2</i>     | 3 |
| chr16 | 1543351   | 1560460   | <i>TELO2</i>    | 3 |
| chr17 | 18174741  | 18218406  | <i>TOP3A</i>    | 3 |
| chr22 | 22311396  | 22337240  | <i>TOP3B</i>    | 3 |
| chr3  | 133319448 | 133380737 | <i>TOPBP1</i>   | 3 |
| chr15 | 43699411  | 43802707  | <i>TP53BP1</i>  | 3 |
| chr3  | 48506918  | 48509044  | <i>TREX1</i>    | 3 |
| chrX  | 152710177 | 152711945 | <i>TREX2</i>    | 3 |
| chr6  | 80714321  | 80752244  | <i>TTK</i>      | 3 |
| chr18 | 657603    | 673499    | <i>TYMS</i>     | 3 |
| chrX  | 118708429 | 118718392 | <i>UBE2A</i>    | 3 |
| chr5  | 133706866 | 133727799 | <i>UBE2B</i>    | 3 |
| chr12 | 93802087  | 93836026  | <i>UBE2N</i>    | 3 |
| chr1  | 202300784 | 202311094 | <i>UBE2T</i>    | 3 |
| chr8  | 48920994  | 48974454  | <i>UBE2V2</i>   | 3 |
| chr5  | 176332005 | 176433795 | <i>UIMC1</i>    | 3 |
| chr12 | 109535398 | 109548798 | <i>UNG</i>      | 3 |
| chr1  | 62901974  | 62917475  | <i>USP1</i>     | 3 |
| chr4  | 1341053   | 1381837   | <i>UVSSA</i>    | 3 |
| chr3  | 39093476  | 39138162  | <i>WDR48</i>    | 3 |

|       |           |           |               |   |
|-------|-----------|-----------|---------------|---|
| chr11 | 9595227   | 9611314   | <i>WEE1</i>   | 3 |
| chr8  | 30890777  | 31031277  | <i>WRN</i>    | 3 |
| chr19 | 7684410   | 7694439   | <i>XAB2</i>   | 3 |
| chr9  | 100437190 | 100459691 | <i>XPA</i>    | 3 |
| chr3  | 14186646  | 14220172  | <i>XPC</i>    | 3 |
| chr19 | 44047463  | 44079730  | <i>XRCC1</i>  | 3 |
| chr7  | 152343582 | 152373250 | <i>XRCC2</i>  | 3 |
| chr14 | 104163953 | 104181823 | <i>XRCC3</i>  | 3 |
| chr5  | 82373227  | 82649579  | <i>XRCC4</i>  | 3 |
| chr2  | 216974019 | 217071016 | <i>XRCC5</i>  | 3 |
| chr22 | 42017166  | 42060052  | <i>XRCC6</i>  | 3 |
| chr20 | 43514239  | 43537173  | <i>YWHAB</i>  | 3 |
| chr17 | 1247833   | 1303556   | <i>YWHAE</i>  | 3 |
| chr7  | 75956107  | 75988342  | <i>YWHAG</i>  | 3 |
| chr17 | 15879873  | 15903006  | <i>ZSWIM7</i> | 3 |
